# Supplementary material for: Genome-Wide Association Studies and fine-mapping of genomic loci for n-3 and n-6 Polyunsaturated Fatty Acids in Hispanic American and African American Cohorts
Source: Research Square preprint supplement (doi:10.21203/rs.3.rs-2073736/v1), 2023-02-24
Supplement: Supplementary file 2 [file 46a7ac78e7a98dd1c807b244.xlsx]

## Sheet: Table S1 Variants in EUR GWAS
Table S1. Examination of variants identified in prior CHARGE European American GWAS of PUFAs
	Previous n-3 and n-6 GWAS at European American from CHARGE							Current GWAS Meta-analysis in Hispanics Americans			Current GWAS Meta-analysis in African Americans
Fatty Acid(Chr)	SNP	EFFECT_ALLELE	OTHER_ALLELE	MAF_EA	beta_EA	Pval_EA		Freq_HIS	Zscore_HIS	P.value_HIS	Freq_AFA	Zscore_AFA	P.value_AFA
AA(11)	rs174547	C	T	0.33	−1.69	3.0E-971		0.5053	-24.153	6.91e-129	0.0954	-13.776	3.556e-43
AA(16)	rs16966952	A	G	0.31	−0.20	2.4E−10		0.4417	-0.126	0.8996	0.1862	-1.351	0.1767
ALA	rs174547	C	T	0.33	0.016	4e-64		0.5053	7.707	1.288e-14	0.0954	4.553	5.29e-06
DGLA(11)	rs174547	C	T	0.33	0.36	2.6E−151		0.5053	14.955	1.449e-50	0.0981	7.884	3.168e-15
DGLA(16)	rs16966952	A	G	0.31	−0.22	7.6E−65		0.4417	-7.214	5.435e-13	0.1862	-5.654	1.568e-08
DHA(6)	rs2236212	C	G	0.43	−0.113	1e-15		0.5087	-2.818	0.004839	0.2242	-2.364	0.01805
DPA(2)	rs780094	T	C	0.41	0.017	9E−09		0.3348	3.085	0.002036	0.1917	3.932	8.418e-05
DPA(6)	rs3734398	C	T	0.43	0.04	1E−43		0.5685	2.714	0.00664	0.2568	5.201	1.986e-07
DPA (11)	rs174547	C	T	0.33	−0.075	4E−154		0.5053	-11.173	5.502e-29	0.0981	-3.923	8.733e-05
EPA(6)	rs3798713	C	G	0.43	0.035	2E−12		0.5106	1.402	0.161	0.284	2.34	0.01929
EPA(11)	rs174538	A	G	0.28	−0.083	5E−58		0.4889	-11.352	7.283e-30	0.0904	-1.94	0.05233
GLA(11)	rs174547	C	T	0.33	−0.016	2.3E−72		0.5053	-7.425	1.129e-13	0.0981	-3.542	0.0003973
GLA(16)	rs16966952	A	G	0.31	−0.0061	5.0E−11		0.4417	-3.28	0.001037	0.1862	-3.221	0.001279
LA(10)	rs10740118	C	G	0.44	−0.25	8.1E−09		0.285	-1.539	0.1239	0.323	-2.411	0.0159
LA(11)	rs174547	C	T	0.33	1.47	5.0E−274		0.5053	14.72	4.826e-49	0.0981	6.06	1.357e-09
LA(16)	rs16966952	A	G	0.31	−0.35	1.2E−15		0.4417	2.921	0.003486	0.1862	1.904	0.05692

## Sheet: Table S2 Credible Sets in HIS 
Table S2. Credible sets of putative causal variants for each of the PUFAs in Hispanic Americans
PUFAs	Variants	Chr	Pos	EFFECT_ALLELE	OTHER_ALLELE	EAF	Zscore	Pvalue	Credible set	PIP	Novel / Known
AA	rs102274	11	61557826	C	T	0.5065	-24.261	5.12e-130	1	0.308982	Known
	rs174537	11	61552680	T	G	0.507	-24.249	6.74e-130	1	0.283869	Known
	rs174550	11	61571478	C	T	0.5053	-24.145	8.52e-129	1	0.119762	Known
	rs174546	11	61569830	T	C	0.5049	-24.141	9.33e-129	1	0.101583	Known
	rs174547	11	61570783	C	T	0.5053	-24.153	6.91e-129	1	0.0811684	Known
	rs174533	11	61549025	A	G	0.5079	-24.228	1.12e-129	1	0.0495404	Known
	rs174551	11	61573684	C	T	0.505	-24.145	8.5e-129	1	0.0273122	Known
	rs142068305	11	67065755	T	G	0.196	-7.063	1.633e-12	2	0.999966	Novel
	rs28364240	11	67120530	G	C	0.2041	-7.043	1.88e-12	3	0.999954	Novel
	rs2668898	11	61725498	G	A	0.4025	-5.837	5.325e-09	4	0.999549	Known
	rs180792704	11	67325239	C	G	0.1995	-7.567	3.816e-14	5	0.99947	Novel
	rs198434	11	61483417	A	G	0.7104	-8.976	2.805e-19	6	0.997257	Known
	rs518804	11	57494487	C	A	0.4207	-7.738	1.012e-14	7	0.991419	Novel
	rs3177514	11	66130358	G	T	0.6996	-5.606	2.068e-08	8	0.979563	Novel
ALA	rs174562	11	61585144	G	A	0.5036	7.846	4.307e-15	1	0.0728849	Known
	rs174561	11	61582708	C	T	0.4813	7.826	5.051e-15	1	0.0624747	Known
	rs174557	11	61581368	G	A	0.4819	7.816	5.432e-15	1	0.0578498	Known
	rs174544	11	61567753	A	C	0.4818	7.808	5.804e-15	1	0.0544015	Known
	rs174556	11	61580635	T	C	0.4813	7.807	5.835e-15	1	0.0539854	Known
	rs28456	11	61589481	G	A	0.5053	7.807	5.849e-15	1	0.0539854	Known
	rs174555	11	61579760	C	T	0.4814	7.804	5.992e-15	1	0.0527564	Known
	rs174549	11	61571382	A	G	0.4819	7.802	6.112e-15	1	0.0519529	Known
	rs174568	11	61593816	T	C	0.5042	7.785	6.967e-15	1	0.0456064	Known
	rs1535	11	61597972	G	A	0.5201	7.783	7.104e-15	1	0.0449135	Known
	rs174541	11	61565908	C	T	0.5069	7.759	8.555e-15	1	0.0373872	Known
	rs174554	11	61579463	G	A	0.5049	7.756	8.738e-15	1	0.0365413	Known
	rs174533	11	61549025	A	G	0.5079	7.754	8.886e-15	1	0.0359881	Known
	rs174564	11	61588305	G	A	0.5206	7.743	9.695e-15	1	0.0330946	Known
	rs174553	11	61575158	G	A	0.5051	7.731	1.064e-14	1	0.0302068	Known
	rs4246215	11	61564299	T	G	0.5062	7.726	1.108e-14	1	0.0290804	Known
	rs174551	11	61573684	C	T	0.505	7.718	1.179e-14	1	0.0273664	Known
	rs102274	11	61557826	C	T	0.5065	7.718	1.184e-14	1	0.0273664	Known
	rs174545	11	61569306	G	C	0.5052	7.711	1.248e-14	1	0.025951	Known
	rs174550	11	61571478	C	T	0.5053	7.708	1.273e-14	1	0.0253674	Known
	rs174547	11	61570783	C	T	0.5053	7.707	1.288e-14	1	0.0251758	Known
	rs174546	11	61569830	T	C	0.5049	7.704	1.314e-14	1	0.02461	Known
	rs174536	11	61551927	C	A	0.5089	7.699	1.369e-14	1	0.0236955	Known
	rs174537	11	61552680	T	G	0.507	7.694	1.428e-14	1	0.0228155	Known
DGLA	rs174559	11	61581656	A	G	0.464	14.6	2.75e-48	1	0.833632	Known
	rs174538	11	61560081	A	G	0.4889	14.704	6.032e-49	1	0.162329	Known
	rs174585	11	61611694	A	G	0.2749	9.826	8.724e-23	2	1	Known
	rs198434	11	61483417	A	G	0.7104	6.272	3.57e-10	3	0.999861	Known
	rs198461	11	61524366	C	A	0.3635	-5.959	2.544e-09	4	0.999905	Known
	rs4985155	16	15129459	G	A	0.5242	-7.72	1.161e-14	1	0.363385	Known
	rs4985148	16	15147788	C	A	0.46	-7.509	5.978e-14	1	0.0749898	Known
	rs35574015	16	15146061	C	T	0.4413	-7.505	6.149e-14	1	0.0728103	Known
	rs62039480	16	15137450	A	G	0.4875	-7.495	6.607e-14	1	0.0676394	Known
	rs72774845	16	15147954	C	A	0.4545	-7.443	9.849e-14	1	0.0461872	Known
	rs4985149	16	15147338	T	A	0.4544	-7.394	1.428e-13	1	0.032319	Known
	rs2740	16	15132108	G	A	0.4466	-7.379	1.593e-13	1	0.0289866	Known
	rs3803573	16	15138413	T	C	0.445	-7.332	2.26e-13	1	0.0206407	Known
	rs14347	16	15133889	G	T	0.4508	-7.331	2.285e-13	1	0.0204927	Known
	rs34614532	16	15132908	C	T	0.4509	-7.331	2.291e-13	1	0.0204926	Known
	rs35769159	16	15127534	A	T	0.4345	-7.325	2.382e-13	1	0.0196264	Known
	rs55727637	16	15145252	T	C	0.4509	-7.308	2.706e-13	1	0.0173693	Known
	rs12920234	16	15138853	C	T	0.4609	-7.306	2.75e-13	1	0.0171218	Known
	rs1136001	16	15131974	T	G	0.4503	-7.298	2.928e-13	1	0.0161499	Known
	rs1135999	16	15131962	G	A	0.4503	-7.297	2.941e-13	1	0.0160686	Known
	rs72789542	16	15127535	A	C	0.4345	-7.297	2.933e-13	1	0.0160515	Known
	rs6498540	16	15130594	G	A	0.4549	-7.28	3.346e-13	1	0.0142122	Known
	rs7200543	16	15129970	G	A	0.4501	-7.273	3.514e-13	1	0.0135184	Known
	rs4985152	16	15136619	A	T	0.4439	-7.264	3.752e-13	1	0.0126772	Known
	rs4985123	16	15142768	G	A	0.4567	-7.26	3.863e-13	1	0.0123208	Known
	rs16966953	16	15135854	G	A	0.4483	-7.253	4.066e-13	1	0.0117211	Known
	rs1121	16	15131076	A	G	0.4473	-7.219	5.247e-13	1	0.00920492	Known
	rs12934815	16	15139017	G	A	0.46	-7.218	5.274e-13	1	0.0091399	Known
	rs4500751	16	15140211	T	C	0.4593	-7.218	5.289e-13	1	0.00913984	Known
	rs12934835	16	15139051	G	A	0.4599	-7.216	5.371e-13	1	0.00901123	Known
DPA	rs1535	11	61597972	G	A	0.5201	-11.318	1.073e-29	1	0.183284	Known
	rs28456	11	61589481	G	A	0.5053	-11.112	1.099e-28	1	0.119946	Known
	rs174555	11	61579760	C	T	0.4814	-11.134	8.58e-29	1	0.0775681	Known
	rs174556	11	61580635	T	C	0.4813	-11.131	8.826e-29	1	0.0752841	Known
	rs174561	11	61582708	C	T	0.4813	-11.12	9.995e-29	1	0.0672712	Known
	rs174557	11	61581368	G	A	0.4819	-11.119	1.019e-28	1	0.0670247	Known
	rs174549	11	61571382	A	G	0.4819	-11.082	1.538e-28	1	0.0475938	Known
	rs174544	11	61567753	A	C	0.4818	-11.08	1.569e-28	1	0.0462231	Known
	rs174547	11	61570783	C	T	0.5053	-11.173	5.502e-29	1	0.0397863	Known
	rs174546	11	61569830	T	C	0.5049	-11.171	5.664e-29	1	0.0387429	Known
	rs174545	11	61569306	G	C	0.5052	-11.163	6.163e-29	1	0.0359254	Known
	rs174550	11	61571478	C	T	0.5053	-11.161	6.309e-29	1	0.0353844	Known
	rs174551	11	61573684	C	T	0.505	-11.154	6.848e-29	1	0.0326662	Known
	rs174553	11	61575158	G	A	0.5051	-11.141	7.908e-29	1	0.0289896	Known
	rs174554	11	61579463	G	A	0.5049	-11.119	1.019e-28	1	0.0233558	Known
	rs4246215	11	61564299	T	G	0.5062	-11.112	1.096e-28	1	0.0226067	Known
	rs174564	11	61588305	G	A	0.5206	-11.029	2.781e-28	1	0.0167156	Known
	rs102274	11	61557826	C	T	0.5065	-11.087	1.443e-28	1	0.0161831	Known
	rs198434	11	61483417	A	G	0.7104	-6.267	3.676e-10	2	0.999999	Known
EPA	rs102274	11	61557826	C	T	0.5065	-11.565	6.184e-31	1	0.0991899	Known
	rs174547	11	61570783	C	T	0.5053	-11.558	6.709e-31	1	0.0920173	Known
	rs174537	11	61552680	T	G	0.507	-11.556	6.881e-31	1	0.0898243	Known
	rs174546	11	61569830	T	C	0.5049	-11.552	7.196e-31	1	0.0861695	Known
	rs174550	11	61571478	C	T	0.5053	-11.55	7.379e-31	1	0.0842926	Known
	rs174545	11	61569306	G	C	0.5052	-11.549	7.478e-31	1	0.0833669	Known
	rs174533	11	61549025	A	G	0.5079	-11.542	8.115e-31	1	0.0771023	Known
	rs174551	11	61573684	C	T	0.505	-11.537	8.58e-31	1	0.073149	Known
	rs174536	11	61551927	C	A	0.5089	-11.531	9.258e-31	1	0.0685194	Known
	rs174553	11	61575158	G	A	0.5051	-11.526	9.764e-31	1	0.0649477	Known
	rs174554	11	61579463	G	A	0.5049	-11.491	1.465e-30	1	0.0447804	Known
	rs174541	11	61565908	C	T	0.5069	-11.483	1.598e-30	1	0.0412329	Known
	rs4246215	11	61564299	T	G	0.5062	-11.478	1.696e-30	1	0.0391792	Known
	rs1535	11	61597972	G	A	0.5201	-11.454	2.235e-30	1	0.030712	Known
	rs174562	11	61585144	G	A	0.5036	-11.366	6.162e-30	1	0.0135929	Known
	rs174549	11	61571382	A	G	0.4819	-11.361	6.542e-30	1	0.0128752	Known
	rs174544	11	61567753	A	C	0.4818	-11.355	6.977e-30	1	0.0122719	Known
GLA	rs174576	11	61603510	A	C	0.5461	-7.73	1.071e-14	1	0.177686	Known
	rs174564	11	61588305	G	A	0.5206	-7.728	1.095e-14	1	0.175008	Known
	rs174533	11	61549025	A	G	0.5079	-7.706	1.295e-14	1	0.148115	Known
	rs174536	11	61551927	C	A	0.5089	-7.633	2.295e-14	1	0.0854374	Known
	rs174537	11	61552680	T	G	0.507	-7.625	2.432e-14	1	0.0804636	Known
	rs174583	11	61609750	T	C	0.5486	-7.563	3.933e-14	1	0.0506586	Known
	rs102274	11	61557826	C	T	0.5065	-7.554	4.234e-14	1	0.0473827	Known
	rs174547	11	61570783	C	T	0.5053	-7.425	1.129e-13	1	0.0183347	Known
	rs174546	11	61569830	T	C	0.5049	-7.422	1.157e-13	1	0.0179378	Known
	rs174545	11	61569306	G	C	0.5052	-7.421	1.167e-13	1	0.0178075	Known
	rs174550	11	61571478	C	T	0.5053	-7.419	1.182e-13	1	0.0175497	Known
	rs174553	11	61575158	G	A	0.5051	-7.414	1.224e-13	1	0.0169216	Known
	rs174551	11	61573684	C	T	0.505	-7.412	1.243e-13	1	0.0166769	Known
	rs4246215	11	61564299	T	G	0.5062	-7.412	1.24e-13	1	0.0166769	Known
	rs174554	11	61579463	G	A	0.5049	-7.404	1.321e-13	1	0.0157333	Known
	rs174541	11	61565908	C	T	0.5069	-7.395	1.414e-13	1	0.0147366	Known
	rs174562	11	61585144	G	A	0.5036	-7.393	1.432e-13	1	0.014524	Known
	rs174530	11	61546592	G	A	0.5216	-7.388	1.487e-13	1	0.0140061	Known
	rs174568	11	61593816	T	C	0.5042	-7.386	1.512e-13	1	0.0138042	Known
LA	rs174564	11	61588305	G	A	0.5206	15.118	1.235e-51	1	0.747415	Known
	rs1535	11	61597972	G	A	0.5201	14.81	1.262e-49	1	0.0529415	Known
	rs174562	11	61585144	G	A	0.5036	14.776	2.094e-49	1	0.0455732	Known
	rs174547	11	61570783	C	T	0.5053	14.72	4.826e-49	1	0.018807	Known
	rs102274	11	61557826	C	T	0.5065	14.695	6.915e-49	1	0.0173607	Known
	rs174537	11	61552680	T	G	0.507	14.686	7.946e-49	1	0.0173518	Known
	rs174554	11	61579463	G	A	0.5049	14.709	5.643e-49	1	0.0164408	Known
	rs174553	11	61575158	G	A	0.5051	14.71	5.537e-49	1	0.0163462	Known
	rs174546	11	61569830	T	C	0.5049	14.71	5.568e-49	1	0.0158055	Known
	rs174545	11	61569306	G	C	0.5052	14.707	5.834e-49	1	0.0150636	Known
	rs10751002	11	63617634	G	T	0.6648	6.06	1.365e-09	2	1	Novel
	rs2668898	11	61725498	G	A	0.4025	5.542	2.994e-08	3	0.999989	Known
	rs28364240	11	67120530	G	C	0.2041	5.909	3.444e-09	4	0.999983	Novel
	rs11039018	11	46909524	A	C	0.67	-6.107	1.016e-09	5	0.999885	Novel
	rs518804	11	57494487	C	A	0.4207	6.031	1.626e-09	6	0.9987	Known

## Sheet: Table S3 Credible set in AFA
Table S3. Credible sets of putative causal variants for eachof the PUFAs in African Americans
PUFAs	Variants	Chr	Pos	EFFECT_ALLELE	OTHER_ALLELE	EAF	Zscore	Pvalue	Credible set	PIP	Novel / Known
AA	rs174585	11	61611694	A	G	0.0607	-9.328	1.08e-20	1	1	Known
	rs174607	11	61627321	C	G	0.0788	-6.492	8.47e-11	2	0.999991	Known
	rs174564	11	61588305	G	A	0.1337	-14.855	6.43e-50	3	0.989565	Known
	rs174559	11	61581656	A	G	0.0783	-13.684	1.27e-42	4	0.982894	Known
	rs17161592	7	9388418	C	G	0.085	-6.312	2.75e-10	1	0.781806	Novel
	rs60686490	7	9396059	G	T	0.1201	-6.101	1.056e-09	1	0.218194	Novel
DGLA	rs174560	11	61581764	C	T	0.2163	9.12	7.51e-20	1	0.96687	Known
	rs1136001	16	15131974	T	G	0.2203	-6.114	9.69e-10	2	0.136441	Known
	rs34614532	16	15132908	C	T	0.2201	-6.091	1.12e-09	2	0.11904	Known
	rs14347	16	15133889	G	T	0.2196	-6.064	1.327e-09	2	0.10149	Known
	rs1135999	16	15131962	G	A	0.2205	-6.06	1.363e-09	2	0.0991261	Known
	rs12934815	16	15139017	G	A	0.2106	-5.982	2.204e-09	2	0.0627964	Known
	rs12920234	16	15138853	C	T	0.2224	-5.964	2.457e-09	2	0.0565651	Known
	rs2740	16	15132108	G	A	0.2046	-5.956	2.589e-09	2	0.0540033	Known
	rs7200543	16	15129970	G	A	0.2193	-5.954	2.618e-09	2	0.0533818	Known
	rs1121	16	15131076	A	G	0.2111	-5.929	3.051e-09	2	0.046205	Known
	rs3803573	16	15138413	T	C	0.1953	-5.894	3.776e-09	2	0.0377874	Known
	rs4985152	16	15136619	A	T	0.1956	-5.877	4.182e-09	2	0.0342855	Known
	rs12934835	16	15139051	G	A	0.2114	-5.874	4.247e-09	2	0.0337031	Known
	rs16966953	16	15135854	G	A	0.2097	-5.874	4.264e-09	2	0.0337031	Known
	rs3803575	16	15138447	C	T	0.212	-5.873	4.275e-09	2	0.0335112	Known
	rs4985150	16	15136685	G	A	0.2033	-5.795	6.816e-09	2	0.0215325	Known
	rs16966947	16	15141045	C	T	0.2145	-5.779	7.498e-09	2	0.0196792	Known
	rs4500751	16	15140211	T	C	0.2096	-5.666	1.462e-08	2	0.0104962	Known
DPA	rs717894	6	22119292	A	G	0.2504	-5.486	4.11e-08	1	0.999998	Novel
	rs9295741	6	10997166	T	C	0.2237	5.548	2.89e-08	2	0.562635	Known
	rs2236212	6	10995015	C	G	0.2242	5.499	3.82e-08	2	0.437366	Known
LA	rs28456	11	61589481	G	A	0.1633	7.885	3.14e-15	1	0.681052	Known
	rs1535	11	61597972	G	A	0.1665	7.781	7.189e-15	1	0.305588	Known

## Sheet: Table S4 Chromatin Contact 
Table S4. Chromatin Contact Analysis for Understanding the Chromatin Interaction on Chromosome 11
phenotype	variant	chr	pos_hg37	credible_set	effect_allele	other_allele	eaf	zscore	pvalue	gene_name	gene_id	biotype	bait_start	bait_end	otherEnd_start	otherEnd_end	oeGenes	b2b	chicago_score	frag	cell
AA	11:67120530	chr11	67120530	5	G	C	0.2041	-7.043	1.88e-12	AP003419.11	ENSG00000256514.1	noncoding_RNA	67137511	67141505	67119774	67122304	POLD4	TRUE	26.18	4frag	Enteroid
LA	11:67120530	chr11	67120530	2	G	C	0.2041	5.909	3.444e-09	AP003419.11	ENSG00000256514.1	noncoding_RNA	67137511	67141505	67119774	67122304	POLD4	TRUE	26.18	4frag	Enteroid
AA	11:67120530	chr11	67120530	5	G	C	0.2041	-7.043	1.88e-12	CLCF1	ENSG00000175505.9	protein_coding	67137511	67141505	67119774	67122304	POLD4	TRUE	26.18	4frag	Enteroid
LA	11:67120530	chr11	67120530	2	G	C	0.2041	5.909	3.444e-09	CLCF1	ENSG00000175505.9	protein_coding	67137511	67141505	67119774	67122304	POLD4	TRUE	26.18	4frag	Enteroid
AA	11:67120530	chr11	67120530	5	G	C	0.2041	-7.043	1.88e-12	AP003419.11	ENSG00000256514.1	noncoding_RNA	67141506	67147237	67119774	67122304	POLD4	TRUE	20.37	4frag	Enteroid
LA	11:67120530	chr11	67120530	2	G	C	0.2041	5.909	3.444e-09	AP003419.11	ENSG00000256514.1	noncoding_RNA	67141506	67147237	67119774	67122304	POLD4	TRUE	20.37	4frag	Enteroid
AA	11:67120530	chr11	67120530	5	G	C	0.2041	-7.043	1.88e-12	CLCF1	ENSG00000175505.9	protein_coding	67141506	67147237	67119774	67122304	POLD4	TRUE	20.37	4frag	Enteroid
LA	11:67120530	chr11	67120530	2	G	C	0.2041	5.909	3.444e-09	CLCF1	ENSG00000175505.9	protein_coding	67141506	67147237	67119774	67122304	POLD4	TRUE	20.37	4frag	Enteroid
DGLA	11:61560081	chr11	61560081	1	A	G	0.4889	14.704	6.032e-49	MYRF	ENSG00000124920.9	protein_coding	61520317	61525535	61559937	61561535	FEN1|TMEM258|FADS2|MIR611	TRUE	16.74	4frag	Enteroid
DGLA	11:61560081	chr11	61560081	1	A	G	0.4889	14.704	6.032e-49	RP11-467L20.10	ENSG00000124915.6	noncoding_RNA	61520317	61525535	61559937	61561535	FEN1|TMEM258|FADS2|MIR611	TRUE	16.74	4frag	Enteroid
DGLA	11:61560081	chr11	61560081	1	A	G	0.4889	14.704	6.032e-49	BEST1	ENSG00000167995.11	protein_coding	61716786	61718416	61559937	61561535	FEN1|TMEM258|FADS2|MIR611	TRUE	14.33	4frag	hMSC_Adipocyte
AA	11:67120530	chr11	67120530	5	G	C	0.2041	-7.043	1.88e-12	AP003419.11	ENSG00000256514.1	noncoding_RNA	67141506	67147237	67119774	67122304	POLD4	TRUE	12.93	4frag	hMSC_Adipocyte
LA	11:67120530	chr11	67120530	2	G	C	0.2041	5.909	3.444e-09	AP003419.11	ENSG00000256514.1	noncoding_RNA	67141506	67147237	67119774	67122304	POLD4	TRUE	12.93	4frag	hMSC_Adipocyte
AA	11:67120530	chr11	67120530	5	G	C	0.2041	-7.043	1.88e-12	CLCF1	ENSG00000175505.9	protein_coding	67141506	67147237	67119774	67122304	POLD4	TRUE	12.93	4frag	hMSC_Adipocyte
LA	11:67120530	chr11	67120530	2	G	C	0.2041	5.909	3.444e-09	CLCF1	ENSG00000175505.9	protein_coding	67141506	67147237	67119774	67122304	POLD4	TRUE	12.93	4frag	hMSC_Adipocyte
AA	11:67120530	chr11	67120530	5	G	C	0.2041	-7.043	1.88e-12	ANKRD13D	ENSG00000172932.10	protein_coding	67052623	67057154	67119774	67122304	POLD4	TRUE	12.76	4frag	Enteroid
LA	11:67120530	chr11	67120530	2	G	C	0.2041	5.909	3.444e-09	ANKRD13D	ENSG00000172932.10	protein_coding	67052623	67057154	67119774	67122304	POLD4	TRUE	12.76	4frag	Enteroid
AA	11:67120530	chr11	67120530	5	G	C	0.2041	-7.043	1.88e-12	AP003419.11	ENSG00000256514.1	noncoding_RNA	67141506	67147237	67119774	67122304	POLD4	TRUE	12.64	4frag	iPSC_Hepatocytes
LA	11:67120530	chr11	67120530	2	G	C	0.2041	5.909	3.444e-09	AP003419.11	ENSG00000256514.1	noncoding_RNA	67141506	67147237	67119774	67122304	POLD4	TRUE	12.64	4frag	iPSC_Hepatocytes
AA	11:67120530	chr11	67120530	5	G	C	0.2041	-7.043	1.88e-12	CLCF1	ENSG00000175505.9	protein_coding	67141506	67147237	67119774	67122304	POLD4	TRUE	12.64	4frag	iPSC_Hepatocytes
LA	11:67120530	chr11	67120530	2	G	C	0.2041	5.909	3.444e-09	CLCF1	ENSG00000175505.9	protein_coding	67141506	67147237	67119774	67122304	POLD4	TRUE	12.64	4frag	iPSC_Hepatocytes
AA	11:67120530	chr11	67120530	5	G	C	0.2041	-7.043	1.88e-12	AP003419.11	ENSG00000256514.1	noncoding_RNA	67141506	67147237	67119774	67122304	POLD4	TRUE	12.36	4frag	hESC_HypothalamicNeuron
LA	11:67120530	chr11	67120530	2	G	C	0.2041	5.909	3.444e-09	AP003419.11	ENSG00000256514.1	noncoding_RNA	67141506	67147237	67119774	67122304	POLD4	TRUE	12.36	4frag	hESC_HypothalamicNeuron
AA	11:67120530	chr11	67120530	5	G	C	0.2041	-7.043	1.88e-12	CLCF1	ENSG00000175505.9	protein_coding	67141506	67147237	67119774	67122304	POLD4	TRUE	12.36	4frag	hESC_HypothalamicNeuron
LA	11:67120530	chr11	67120530	2	G	C	0.2041	5.909	3.444e-09	CLCF1	ENSG00000175505.9	protein_coding	67141506	67147237	67119774	67122304	POLD4	TRUE	12.36	4frag	hESC_HypothalamicNeuron
DGLA	11:61560081	chr11	61560081	1	A	G	0.4889	14.704	6.032e-49	MYRF	ENSG00000124920.9	protein_coding	61520317	61525535	61559937	61561535	FEN1|TMEM258|FADS2|MIR611	TRUE	11.92	4frag	iPSC_Hepatocytes
DGLA	11:61560081	chr11	61560081	1	A	G	0.4889	14.704	6.032e-49	RP11-467L20.10	ENSG00000124915.6	noncoding_RNA	61520317	61525535	61559937	61561535	FEN1|TMEM258|FADS2|MIR611	TRUE	11.92	4frag	iPSC_Hepatocytes
ALA	11:61582708	chr11	61582708	1	C	T	0.4813	7.826	5.051e-15	BEST1	ENSG00000167995.11	protein_coding	61716786	61718416	61581230	61583902	FADS1|FADS2|MIR1908	TRUE	11.38	4frag	hMSC_Adipocyte
DPA	11:61582708	chr11	61582708	2	C	T	0.4813	-11.12	9.995e-29	BEST1	ENSG00000167995.11	protein_coding	61716786	61718416	61581230	61583902	FADS1|FADS2|MIR1908	TRUE	11.38	4frag	hMSC_Adipocyte
DGLA	11:61524366	chr11	61524366	4	C	A	0.3635	-5.959	2.544e-09	FADS2	ENSG00000134824.9	protein_coding	61559937	61561535	61520317	61525535	MYRF|RP11-467L20.10	TRUE	11.31	4frag	Enteroid
DGLA	11:61524366	chr11	61524366	4	C	A	0.3635	-5.959	2.544e-09	FEN1	ENSG00000168496.3	protein_coding	61559937	61561535	61520317	61525535	MYRF|RP11-467L20.10	TRUE	11.31	4frag	Enteroid
DGLA	11:61524366	chr11	61524366	4	C	A	0.3635	-5.959	2.544e-09	MIR611	ENSG00000207601.1	noncoding_RNA	61559937	61561535	61520317	61525535	MYRF|RP11-467L20.10	TRUE	11.31	4frag	Enteroid
DGLA	11:61524366	chr11	61524366	4	C	A	0.3635	-5.959	2.544e-09	TMEM258	ENSG00000134825.9	protein_coding	61559937	61561535	61520317	61525535	MYRF|RP11-467L20.10	TRUE	11.31	4frag	Enteroid
AA	11:67120530	chr11	67120530	5	G	C	0.2041	-7.043	1.88e-12	AP003419.11	ENSG00000256514.1	noncoding_RNA	67141506	67147237	67119774	67122304	POLD4	TRUE	11.1	4frag	hMSC
LA	11:67120530	chr11	67120530	2	G	C	0.2041	5.909	3.444e-09	AP003419.11	ENSG00000256514.1	noncoding_RNA	67141506	67147237	67119774	67122304	POLD4	TRUE	11.1	4frag	hMSC
AA	11:67120530	chr11	67120530	5	G	C	0.2041	-7.043	1.88e-12	CLCF1	ENSG00000175505.9	protein_coding	67141506	67147237	67119774	67122304	POLD4	TRUE	11.1	4frag	hMSC
LA	11:67120530	chr11	67120530	2	G	C	0.2041	5.909	3.444e-09	CLCF1	ENSG00000175505.9	protein_coding	67141506	67147237	67119774	67122304	POLD4	TRUE	11.1	4frag	hMSC
AA	11:67120530	chr11	67120530	5	G	C	0.2041	-7.043	1.88e-12	AP003419.11	ENSG00000256514.1	noncoding_RNA	67141506	67142593	67120269	67121722	POLD4	TRUE	10.6	1frag	Enteroid
LA	11:67120530	chr11	67120530	2	G	C	0.2041	5.909	3.444e-09	AP003419.11	ENSG00000256514.1	noncoding_RNA	67141506	67142593	67120269	67121722	POLD4	TRUE	10.6	1frag	Enteroid
AA	11:67120530	chr11	67120530	5	G	C	0.2041	-7.043	1.88e-12	CLCF1	ENSG00000175505.9	protein_coding	67141506	67142593	67120269	67121722	POLD4	TRUE	10.6	1frag	Enteroid
LA	11:67120530	chr11	67120530	2	G	C	0.2041	5.909	3.444e-09	CLCF1	ENSG00000175505.9	protein_coding	67141506	67142593	67120269	67121722	POLD4	TRUE	10.6	1frag	Enteroid
AA	11:67120530	chr11	67120530	5	G	C	0.2041	-7.043	1.88e-12	ANKRD13D	ENSG00000172932.10	protein_coding	67052623	67057154	67119774	67122304	POLD4	TRUE	10.08	4frag	iPSC_Hepatocytes
LA	11:67120530	chr11	67120530	2	G	C	0.2041	5.909	3.444e-09	ANKRD13D	ENSG00000172932.10	protein_coding	67052623	67057154	67119774	67122304	POLD4	TRUE	10.08	4frag	iPSC_Hepatocytes
DGLA	11:61560081	chr11	61560081	1	A	G	0.4889	14.704	6.032e-49	RAB3IL1	ENSG00000167994.7	protein_coding	61683959	61688017	61559937	61561535	FEN1|TMEM258|FADS2|MIR611	TRUE	9.79	4frag	Enteroid
AA	11:67120530	chr11	67120530	5	G	C	0.2041	-7.043	1.88e-12	RAD9A	ENSG00000172613.3	protein_coding	67158921	67160701	67119774	67122304	POLD4	TRUE	9.43	4frag	hESC_HypothalamicNeuron
LA	11:67120530	chr11	67120530	2	G	C	0.2041	5.909	3.444e-09	RAD9A	ENSG00000172613.3	protein_coding	67158921	67160701	67119774	67122304	POLD4	TRUE	9.43	4frag	hESC_HypothalamicNeuron
AA	11:67120530	chr11	67120530	5	G	C	0.2041	-7.043	1.88e-12	AP003419.11	ENSG00000256514.1	noncoding_RNA	67137511	67141505	67119774	67122304	POLD4	TRUE	9.3	4frag	iPSC_Hepatocytes
LA	11:67120530	chr11	67120530	2	G	C	0.2041	5.909	3.444e-09	AP003419.11	ENSG00000256514.1	noncoding_RNA	67137511	67141505	67119774	67122304	POLD4	TRUE	9.3	4frag	iPSC_Hepatocytes
AA	11:67120530	chr11	67120530	5	G	C	0.2041	-7.043	1.88e-12	CLCF1	ENSG00000175505.9	protein_coding	67137511	67141505	67119774	67122304	POLD4	TRUE	9.3	4frag	iPSC_Hepatocytes
LA	11:67120530	chr11	67120530	2	G	C	0.2041	5.909	3.444e-09	CLCF1	ENSG00000175505.9	protein_coding	67137511	67141505	67119774	67122304	POLD4	TRUE	9.3	4frag	iPSC_Hepatocytes
ALA	11:61582708	chr11	61582708	1	C	T	0.4813	7.826	5.051e-15	MYRF	ENSG00000124920.9	protein_coding	61520317	61525535	61581230	61583902	FADS1|FADS2|MIR1908	TRUE	9.22	4frag	Enteroid
DPA	11:61582708	chr11	61582708	2	C	T	0.4813	-11.12	9.995e-29	MYRF	ENSG00000124920.9	protein_coding	61520317	61525535	61581230	61583902	FADS1|FADS2|MIR1908	TRUE	9.22	4frag	Enteroid
ALA	11:61582708	chr11	61582708	1	C	T	0.4813	7.826	5.051e-15	RP11-467L20.10	ENSG00000124915.6	noncoding_RNA	61520317	61525535	61581230	61583902	FADS1|FADS2|MIR1908	TRUE	9.22	4frag	Enteroid
DPA	11:61582708	chr11	61582708	2	C	T	0.4813	-11.12	9.995e-29	RP11-467L20.10	ENSG00000124915.6	noncoding_RNA	61520317	61525535	61581230	61583902	FADS1|FADS2|MIR1908	TRUE	9.22	4frag	Enteroid
AA	11:67120530	chr11	67120530	5	G	C	0.2041	-7.043	1.88e-12	RAD9A	ENSG00000172613.3	protein_coding	67158921	67160701	67119774	67122304	POLD4	TRUE	9.12	4frag	hMSC
LA	11:67120530	chr11	67120530	2	G	C	0.2041	5.909	3.444e-09	RAD9A	ENSG00000172613.3	protein_coding	67158921	67160701	67119774	67122304	POLD4	TRUE	9.12	4frag	hMSC
DGLA	11:61560081	chr11	61560081	1	A	G	0.4889	14.704	6.032e-49	RAB3IL1	ENSG00000167994.7	protein_coding	61683959	61688017	61559937	61561535	FEN1|TMEM258|FADS2|MIR611	TRUE	9.04	4frag	hMSC
ALA	11:61582708	chr11	61582708	1	C	T	0.4813	7.826	5.051e-15	BEST1	ENSG00000167995.11	protein_coding	61716786	61718416	61581230	61583902	FADS1|FADS2|MIR1908	TRUE	8.95	4frag	Enteroid
DPA	11:61582708	chr11	61582708	2	C	T	0.4813	-11.12	9.995e-29	BEST1	ENSG00000167995.11	protein_coding	61716786	61718416	61581230	61583902	FADS1|FADS2|MIR1908	TRUE	8.95	4frag	Enteroid
ALA	11:61582708	chr11	61582708	1	C	T	0.4813	7.826	5.051e-15	INCENP	ENSG00000149503.8	protein_coding	61891266	61893437	61581230	61583902	FADS1|FADS2|MIR1908	TRUE	8.76	4frag	hMSC_Adipocyte
DPA	11:61582708	chr11	61582708	2	C	T	0.4813	-11.12	9.995e-29	INCENP	ENSG00000149503.8	protein_coding	61891266	61893437	61581230	61583902	FADS1|FADS2|MIR1908	TRUE	8.76	4frag	hMSC_Adipocyte
ALA	11:61582708	chr11	61582708	1	C	T	0.4813	7.826	5.051e-15	TCONS_00019646	TCONS_00019646	noncoding_RNA	61891266	61893437	61581230	61583902	FADS1|FADS2|MIR1908	TRUE	8.76	4frag	hMSC_Adipocyte
DPA	11:61582708	chr11	61582708	2	C	T	0.4813	-11.12	9.995e-29	TCONS_00019646	TCONS_00019646	noncoding_RNA	61891266	61893437	61581230	61583902	FADS1|FADS2|MIR1908	TRUE	8.76	4frag	hMSC_Adipocyte
DGLA	11:61560081	chr11	61560081	1	A	G	0.4889	14.704	6.032e-49	FADS3	ENSG00000221968.4	protein_coding	61643867	61647000	61559937	61561535	FEN1|TMEM258|FADS2|MIR611	TRUE	8.55	4frag	Enteroid
DGLA	11:61560081	chr11	61560081	1	A	G	0.4889	14.704	6.032e-49	MYRF	ENSG00000124920.9	protein_coding	61520317	61525535	61559937	61561535	FEN1|TMEM258|FADS2|MIR611	TRUE	8.43	4frag	hESC_HypothalamicNeuron
DGLA	11:61560081	chr11	61560081	1	A	G	0.4889	14.704	6.032e-49	RP11-467L20.10	ENSG00000124915.6	noncoding_RNA	61520317	61525535	61559937	61561535	FEN1|TMEM258|FADS2|MIR611	TRUE	8.43	4frag	hESC_HypothalamicNeuron
DGLA	11:61560081	chr11	61560081	1	A	G	0.4889	14.704	6.032e-49	BEST1	ENSG00000167995.11	protein_coding	61716786	61718416	61559937	61561535	FEN1|TMEM258|FADS2|MIR611	TRUE	8.15	4frag	Enteroid
DGLA	11:61560081	chr11	61560081	1	A	G	0.4889	14.704	6.032e-49	MYRF	ENSG00000124920.9	protein_coding	61522851	61525535	61559937	61560806	FEN1|TMEM258|FADS2|MIR611	TRUE	8.03	1frag	Enteroid
DGLA	11:61560081	chr11	61560081	1	A	G	0.4889	14.704	6.032e-49	RP11-467L20.10	ENSG00000124915.6	noncoding_RNA	61522851	61525535	61559937	61560806	FEN1|TMEM258|FADS2|MIR611	TRUE	8.03	1frag	Enteroid
ALA	11:61582708	chr11	61582708	1	C	T	0.4813	7.826	5.051e-15	FADS2	ENSG00000134824.9	protein_coding	61559937	61561535	61581230	61583902	FADS1|FADS2|MIR1908	TRUE	7.92	4frag	hESC_HypothalamicNeuron
DPA	11:61582708	chr11	61582708	2	C	T	0.4813	-11.12	9.995e-29	FADS2	ENSG00000134824.9	protein_coding	61559937	61561535	61581230	61583902	FADS1|FADS2|MIR1908	TRUE	7.92	4frag	hESC_HypothalamicNeuron
ALA	11:61582708	chr11	61582708	1	C	T	0.4813	7.826	5.051e-15	FEN1	ENSG00000168496.3	protein_coding	61559937	61561535	61581230	61583902	FADS1|FADS2|MIR1908	TRUE	7.92	4frag	hESC_HypothalamicNeuron
DPA	11:61582708	chr11	61582708	2	C	T	0.4813	-11.12	9.995e-29	FEN1	ENSG00000168496.3	protein_coding	61559937	61561535	61581230	61583902	FADS1|FADS2|MIR1908	TRUE	7.92	4frag	hESC_HypothalamicNeuron
ALA	11:61582708	chr11	61582708	1	C	T	0.4813	7.826	5.051e-15	MIR611	ENSG00000207601.1	noncoding_RNA	61559937	61561535	61581230	61583902	FADS1|FADS2|MIR1908	TRUE	7.92	4frag	hESC_HypothalamicNeuron
DPA	11:61582708	chr11	61582708	2	C	T	0.4813	-11.12	9.995e-29	MIR611	ENSG00000207601.1	noncoding_RNA	61559937	61561535	61581230	61583902	FADS1|FADS2|MIR1908	TRUE	7.92	4frag	hESC_HypothalamicNeuron
ALA	11:61582708	chr11	61582708	1	C	T	0.4813	7.826	5.051e-15	TMEM258	ENSG00000134825.9	protein_coding	61559937	61561535	61581230	61583902	FADS1|FADS2|MIR1908	TRUE	7.92	4frag	hESC_HypothalamicNeuron
DPA	11:61582708	chr11	61582708	2	C	T	0.4813	-11.12	9.995e-29	TMEM258	ENSG00000134825.9	protein_coding	61559937	61561535	61581230	61583902	FADS1|FADS2|MIR1908	TRUE	7.92	4frag	hESC_HypothalamicNeuron
DGLA	11:61560081	chr11	61560081	1	A	G	0.4889	14.704	6.032e-49	FADS1	ENSG00000149485.12	protein_coding	61581754	61583007	61559937	61560806	FEN1|TMEM258|FADS2|MIR611	TRUE	7.82	1frag	hMSC_Adipocyte
DGLA	11:61560081	chr11	61560081	1	A	G	0.4889	14.704	6.032e-49	FADS2	ENSG00000134824.9	protein_coding	61581754	61583007	61559937	61560806	FEN1|TMEM258|FADS2|MIR611	TRUE	7.82	1frag	hMSC_Adipocyte
DGLA	11:61560081	chr11	61560081	1	A	G	0.4889	14.704	6.032e-49	MIR1908	ENSG00000222326.1	noncoding_RNA	61581754	61583007	61559937	61560806	FEN1|TMEM258|FADS2|MIR611	TRUE	7.82	1frag	hMSC_Adipocyte
DGLA	11:61560081	chr11	61560081	1	A	G	0.4889	14.704	6.032e-49	FADS1	ENSG00000149485.12	protein_coding	61581230	61583902	61559937	61561535	FEN1|TMEM258|FADS2|MIR611	TRUE	7.76	4frag	hESC_HypothalamicNeuron
DGLA	11:61560081	chr11	61560081	1	A	G	0.4889	14.704	6.032e-49	FADS2	ENSG00000134824.9	protein_coding	61581230	61583902	61559937	61561535	FEN1|TMEM258|FADS2|MIR611	TRUE	7.76	4frag	hESC_HypothalamicNeuron
DGLA	11:61560081	chr11	61560081	1	A	G	0.4889	14.704	6.032e-49	MIR1908	ENSG00000222326.1	noncoding_RNA	61581230	61583902	61559937	61561535	FEN1|TMEM258|FADS2|MIR611	TRUE	7.76	4frag	hESC_HypothalamicNeuron
AA	11:67120530	chr11	67120530	5	G	C	0.2041	-7.043	1.88e-12	AP003419.11	ENSG00000256514.1	noncoding_RNA	67141506	67142593	67120269	67121722	POLD4	TRUE	7.73	1frag	hMSC_Adipocyte
LA	11:67120530	chr11	67120530	2	G	C	0.2041	5.909	3.444e-09	AP003419.11	ENSG00000256514.1	noncoding_RNA	67141506	67142593	67120269	67121722	POLD4	TRUE	7.73	1frag	hMSC_Adipocyte
AA	11:67120530	chr11	67120530	5	G	C	0.2041	-7.043	1.88e-12	CLCF1	ENSG00000175505.9	protein_coding	67141506	67142593	67120269	67121722	POLD4	TRUE	7.73	1frag	hMSC_Adipocyte
LA	11:67120530	chr11	67120530	2	G	C	0.2041	5.909	3.444e-09	CLCF1	ENSG00000175505.9	protein_coding	67141506	67142593	67120269	67121722	POLD4	TRUE	7.73	1frag	hMSC_Adipocyte
AA	11:67120530	chr11	67120530	5	G	C	0.2041	-7.043	1.88e-12	RAD9A	ENSG00000172613.3	protein_coding	67158921	67160701	67119774	67122304	POLD4	TRUE	7.55	4frag	hMSC_Adipocyte
LA	11:67120530	chr11	67120530	2	G	C	0.2041	5.909	3.444e-09	RAD9A	ENSG00000172613.3	protein_coding	67158921	67160701	67119774	67122304	POLD4	TRUE	7.55	4frag	hMSC_Adipocyte
DGLA	11:61560081	chr11	61560081	1	A	G	0.4889	14.704	6.032e-49	BEST1	ENSG00000167995.11	protein_coding	61716786	61718416	61559937	61561535	FEN1|TMEM258|FADS2|MIR611	TRUE	7.42	4frag	hESC_HypothalamicNeuron
DGLA	11:61560081	chr11	61560081	1	A	G	0.4889	14.704	6.032e-49	FADS1	ENSG00000149485.12	protein_coding	61581230	61583902	61559937	61561535	FEN1|TMEM258|FADS2|MIR611	TRUE	7.2	4frag	Enteroid
DGLA	11:61560081	chr11	61560081	1	A	G	0.4889	14.704	6.032e-49	FADS2	ENSG00000134824.9	protein_coding	61581230	61583902	61559937	61561535	FEN1|TMEM258|FADS2|MIR611	TRUE	7.2	4frag	Enteroid
DGLA	11:61560081	chr11	61560081	1	A	G	0.4889	14.704	6.032e-49	MIR1908	ENSG00000222326.1	noncoding_RNA	61581230	61583902	61559937	61561535	FEN1|TMEM258|FADS2|MIR611	TRUE	7.2	4frag	Enteroid
ALA	11:61582708	chr11	61582708	1	C	T	0.4813	7.826	5.051e-15	FADS3	ENSG00000221968.4	protein_coding	61643867	61647000	61581230	61583902	FADS1|FADS2|MIR1908	TRUE	7.13	4frag	Enteroid
DPA	11:61582708	chr11	61582708	2	C	T	0.4813	-11.12	9.995e-29	FADS3	ENSG00000221968.4	protein_coding	61643867	61647000	61581230	61583902	FADS1|FADS2|MIR1908	TRUE	7.13	4frag	Enteroid
AA	11:67120530	chr11	67120530	5	G	C	0.2041	-7.043	1.88e-12	RAD9A	ENSG00000172613.3	protein_coding	67160702	67162324	67119774	67122304	POLD4	TRUE	7.11	4frag	hESC_HypothalamicNeuron
LA	11:67120530	chr11	67120530	2	G	C	0.2041	5.909	3.444e-09	RAD9A	ENSG00000172613.3	protein_coding	67160702	67162324	67119774	67122304	POLD4	TRUE	7.11	4frag	hESC_HypothalamicNeuron
AA	11:67120530	chr11	67120530	5	G	C	0.2041	-7.043	1.88e-12	RNU6-1238P	ENSG00000253024.1	noncoding_RNA	67160702	67162324	67119774	67122304	POLD4	TRUE	7.11	4frag	hESC_HypothalamicNeuron
LA	11:67120530	chr11	67120530	2	G	C	0.2041	5.909	3.444e-09	RNU6-1238P	ENSG00000253024.1	noncoding_RNA	67160702	67162324	67119774	67122304	POLD4	TRUE	7.11	4frag	hESC_HypothalamicNeuron
DGLA	11:61560081	chr11	61560081	1	A	G	0.4889	14.704	6.032e-49	FADS1	ENSG00000149485.12	protein_coding	61581230	61583902	61559937	61561535	FEN1|TMEM258|FADS2|MIR611	TRUE	7.1	4frag	iPSC_Hepatocytes
DGLA	11:61560081	chr11	61560081	1	A	G	0.4889	14.704	6.032e-49	FADS2	ENSG00000134824.9	protein_coding	61581230	61583902	61559937	61561535	FEN1|TMEM258|FADS2|MIR611	TRUE	7.1	4frag	iPSC_Hepatocytes
DGLA	11:61560081	chr11	61560081	1	A	G	0.4889	14.704	6.032e-49	MIR1908	ENSG00000222326.1	noncoding_RNA	61581230	61583902	61559937	61561535	FEN1|TMEM258|FADS2|MIR611	TRUE	7.1	4frag	iPSC_Hepatocytes
AA	11:67120530	chr11	67120530	5	G	C	0.2041	-7.043	1.88e-12	RAD9A	ENSG00000172613.3	protein_coding	67158921	67160701	67119774	67122304	POLD4	TRUE	7.04	4frag	Enteroid
LA	11:67120530	chr11	67120530	2	G	C	0.2041	5.909	3.444e-09	RAD9A	ENSG00000172613.3	protein_coding	67158921	67160701	67119774	67122304	POLD4	TRUE	7.04	4frag	Enteroid
ALA	11:61582708	chr11	61582708	1	C	T	0.4813	7.826	5.051e-15	FADS2	ENSG00000134824.9	protein_coding	61559937	61560806	61581754	61583007	FADS2|FADS1|MIR1908	TRUE	7	1frag	hMSC_Adipocyte
DPA	11:61582708	chr11	61582708	2	C	T	0.4813	-11.12	9.995e-29	FADS2	ENSG00000134824.9	protein_coding	61559937	61560806	61581754	61583007	FADS2|FADS1|MIR1908	TRUE	7	1frag	hMSC_Adipocyte
ALA	11:61582708	chr11	61582708	1	C	T	0.4813	7.826	5.051e-15	FEN1	ENSG00000168496.3	protein_coding	61559937	61560806	61581754	61583007	FADS2|FADS1|MIR1908	TRUE	7	1frag	hMSC_Adipocyte
DPA	11:61582708	chr11	61582708	2	C	T	0.4813	-11.12	9.995e-29	FEN1	ENSG00000168496.3	protein_coding	61559937	61560806	61581754	61583007	FADS2|FADS1|MIR1908	TRUE	7	1frag	hMSC_Adipocyte
ALA	11:61582708	chr11	61582708	1	C	T	0.4813	7.826	5.051e-15	MIR611	ENSG00000207601.1	noncoding_RNA	61559937	61560806	61581754	61583007	FADS2|FADS1|MIR1908	TRUE	7	1frag	hMSC_Adipocyte
DPA	11:61582708	chr11	61582708	2	C	T	0.4813	-11.12	9.995e-29	MIR611	ENSG00000207601.1	noncoding_RNA	61559937	61560806	61581754	61583007	FADS2|FADS1|MIR1908	TRUE	7	1frag	hMSC_Adipocyte
ALA	11:61582708	chr11	61582708	1	C	T	0.4813	7.826	5.051e-15	TMEM258	ENSG00000134825.9	protein_coding	61559937	61560806	61581754	61583007	FADS2|FADS1|MIR1908	TRUE	7	1frag	hMSC_Adipocyte
DPA	11:61582708	chr11	61582708	2	C	T	0.4813	-11.12	9.995e-29	TMEM258	ENSG00000134825.9	protein_coding	61559937	61560806	61581754	61583007	FADS2|FADS1|MIR1908	TRUE	7	1frag	hMSC_Adipocyte
DGLA	11:61560081	chr11	61560081	1	A	G	0.4889	14.704	6.032e-49	BEST1	ENSG00000167995.11	protein_coding	61717011	61717560	61559937	61560806	FEN1|TMEM258|FADS2|MIR611	TRUE	6.97	1frag	hMSC_Adipocyte
ALA	11:61582708	chr11	61582708	1	C	T	0.4813	7.826	5.051e-15	BEST1	ENSG00000167995.11	protein_coding	61716786	61718416	61581230	61583902	FADS1|FADS2|MIR1908	TRUE	6.96	4frag	hESC_HypothalamicNeuron
DPA	11:61582708	chr11	61582708	2	C	T	0.4813	-11.12	9.995e-29	BEST1	ENSG00000167995.11	protein_coding	61716786	61718416	61581230	61583902	FADS1|FADS2|MIR1908	TRUE	6.96	4frag	hESC_HypothalamicNeuron
AA	11:67120530	chr11	67120530	5	G	C	0.2041	-7.043	1.88e-12	TMEM134	ENSG00000172663.4	protein_coding	67234241	67237184	67119774	67122304	POLD4	TRUE	6.96	4frag	hESC_HypothalamicNeuron
LA	11:67120530	chr11	67120530	2	G	C	0.2041	5.909	3.444e-09	TMEM134	ENSG00000172663.4	protein_coding	67234241	67237184	67119774	67122304	POLD4	TRUE	6.96	4frag	hESC_HypothalamicNeuron
ALA	11:61582708	chr11	61582708	1	C	T	0.4813	7.826	5.051e-15	FADS2	ENSG00000134824.9	protein_coding	61559937	61561535	61581230	61583902	FADS1|FADS2|MIR1908	TRUE	6.94	4frag	Enteroid
DPA	11:61582708	chr11	61582708	2	C	T	0.4813	-11.12	9.995e-29	FADS2	ENSG00000134824.9	protein_coding	61559937	61561535	61581230	61583902	FADS1|FADS2|MIR1908	TRUE	6.94	4frag	Enteroid
ALA	11:61582708	chr11	61582708	1	C	T	0.4813	7.826	5.051e-15	FEN1	ENSG00000168496.3	protein_coding	61559937	61561535	61581230	61583902	FADS1|FADS2|MIR1908	TRUE	6.94	4frag	Enteroid
DPA	11:61582708	chr11	61582708	2	C	T	0.4813	-11.12	9.995e-29	FEN1	ENSG00000168496.3	protein_coding	61559937	61561535	61581230	61583902	FADS1|FADS2|MIR1908	TRUE	6.94	4frag	Enteroid
ALA	11:61582708	chr11	61582708	1	C	T	0.4813	7.826	5.051e-15	MIR611	ENSG00000207601.1	noncoding_RNA	61559937	61561535	61581230	61583902	FADS1|FADS2|MIR1908	TRUE	6.94	4frag	Enteroid
DPA	11:61582708	chr11	61582708	2	C	T	0.4813	-11.12	9.995e-29	MIR611	ENSG00000207601.1	noncoding_RNA	61559937	61561535	61581230	61583902	FADS1|FADS2|MIR1908	TRUE	6.94	4frag	Enteroid
ALA	11:61582708	chr11	61582708	1	C	T	0.4813	7.826	5.051e-15	TMEM258	ENSG00000134825.9	protein_coding	61559937	61561535	61581230	61583902	FADS1|FADS2|MIR1908	TRUE	6.94	4frag	Enteroid
DPA	11:61582708	chr11	61582708	2	C	T	0.4813	-11.12	9.995e-29	TMEM258	ENSG00000134825.9	protein_coding	61559937	61561535	61581230	61583902	FADS1|FADS2|MIR1908	TRUE	6.94	4frag	Enteroid
DGLA	11:61560081	chr11	61560081	1	A	G	0.4889	14.704	6.032e-49	FADS1	ENSG00000149485.12	protein_coding	61581754	61583007	61559937	61560806	FEN1|TMEM258|FADS2|MIR611	TRUE	6.91	1frag	hMSC
DGLA	11:61560081	chr11	61560081	1	A	G	0.4889	14.704	6.032e-49	FADS2	ENSG00000134824.9	protein_coding	61581754	61583007	61559937	61560806	FEN1|TMEM258|FADS2|MIR611	TRUE	6.91	1frag	hMSC
DGLA	11:61560081	chr11	61560081	1	A	G	0.4889	14.704	6.032e-49	MIR1908	ENSG00000222326.1	noncoding_RNA	61581754	61583007	61559937	61560806	FEN1|TMEM258|FADS2|MIR611	TRUE	6.91	1frag	hMSC
DGLA	11:61524366	chr11	61524366	4	C	A	0.3635	-5.959	2.544e-09	MYRF	ENSG00000124920.9	protein_coding	61519277	61520316	61522851	61525535	RP11-467L20.10|MYRF	TRUE	6.87	1frag	Enteroid
AA	11:67120530	chr11	67120530	5	G	C	0.2041	-7.043	1.88e-12	AP003419.11	ENSG00000256514.1	noncoding_RNA	67141506	67142593	67120269	67121722	POLD4	TRUE	6.81	1frag	iPSC_Hepatocytes
LA	11:67120530	chr11	67120530	2	G	C	0.2041	5.909	3.444e-09	AP003419.11	ENSG00000256514.1	noncoding_RNA	67141506	67142593	67120269	67121722	POLD4	TRUE	6.81	1frag	iPSC_Hepatocytes
AA	11:67120530	chr11	67120530	5	G	C	0.2041	-7.043	1.88e-12	CLCF1	ENSG00000175505.9	protein_coding	67141506	67142593	67120269	67121722	POLD4	TRUE	6.81	1frag	iPSC_Hepatocytes
LA	11:67120530	chr11	67120530	2	G	C	0.2041	5.909	3.444e-09	CLCF1	ENSG00000175505.9	protein_coding	67141506	67142593	67120269	67121722	POLD4	TRUE	6.81	1frag	iPSC_Hepatocytes
DGLA	11:61524366	chr11	61524366	4	C	A	0.3635	-5.959	2.544e-09	MYRF	ENSG00000124920.9	protein_coding	61518081	61520316	61520317	61525535	MYRF|RP11-467L20.10	TRUE	6.78	4frag	Enteroid
AA	11:67120530	chr11	67120530	5	G	C	0.2041	-7.043	1.88e-12	RAD9A	ENSG00000172613.3	protein_coding	67158921	67160701	67119774	67122304	POLD4	TRUE	6.64	4frag	iPSC_Hepatocytes
LA	11:67120530	chr11	67120530	2	G	C	0.2041	5.909	3.444e-09	RAD9A	ENSG00000172613.3	protein_coding	67158921	67160701	67119774	67122304	POLD4	TRUE	6.64	4frag	iPSC_Hepatocytes
DGLA	11:61524366	chr11	61524366	4	C	A	0.3635	-5.959	2.544e-09	FADS2	ENSG00000134824.9	protein_coding	61559937	61560806	61522851	61525535	RP11-467L20.10|MYRF	TRUE	6.63	1frag	Enteroid
DGLA	11:61524366	chr11	61524366	4	C	A	0.3635	-5.959	2.544e-09	FEN1	ENSG00000168496.3	protein_coding	61559937	61560806	61522851	61525535	RP11-467L20.10|MYRF	TRUE	6.63	1frag	Enteroid
DGLA	11:61524366	chr11	61524366	4	C	A	0.3635	-5.959	2.544e-09	MIR611	ENSG00000207601.1	noncoding_RNA	61559937	61560806	61522851	61525535	RP11-467L20.10|MYRF	TRUE	6.63	1frag	Enteroid
DGLA	11:61524366	chr11	61524366	4	C	A	0.3635	-5.959	2.544e-09	TMEM258	ENSG00000134825.9	protein_coding	61559937	61560806	61522851	61525535	RP11-467L20.10|MYRF	TRUE	6.63	1frag	Enteroid
DGLA	11:61524366	chr11	61524366	4	C	A	0.3635	-5.959	2.544e-09	RAB3IL1	ENSG00000167994.7	protein_coding	61683959	61688017	61520317	61525535	MYRF|RP11-467L20.10	TRUE	6.57	4frag	Enteroid
ALA	11:61582708	chr11	61582708	1	C	T	0.4813	7.826	5.051e-15	FADS2	ENSG00000134824.9	protein_coding	61559937	61561535	61581230	61583902	FADS1|FADS2|MIR1908	TRUE	6.31	4frag	hMSC_Adipocyte
DPA	11:61582708	chr11	61582708	2	C	T	0.4813	-11.12	9.995e-29	FADS2	ENSG00000134824.9	protein_coding	61559937	61561535	61581230	61583902	FADS1|FADS2|MIR1908	TRUE	6.31	4frag	hMSC_Adipocyte
ALA	11:61582708	chr11	61582708	1	C	T	0.4813	7.826	5.051e-15	FEN1	ENSG00000168496.3	protein_coding	61559937	61561535	61581230	61583902	FADS1|FADS2|MIR1908	TRUE	6.31	4frag	hMSC_Adipocyte
DPA	11:61582708	chr11	61582708	2	C	T	0.4813	-11.12	9.995e-29	FEN1	ENSG00000168496.3	protein_coding	61559937	61561535	61581230	61583902	FADS1|FADS2|MIR1908	TRUE	6.31	4frag	hMSC_Adipocyte
ALA	11:61582708	chr11	61582708	1	C	T	0.4813	7.826	5.051e-15	MIR611	ENSG00000207601.1	noncoding_RNA	61559937	61561535	61581230	61583902	FADS1|FADS2|MIR1908	TRUE	6.31	4frag	hMSC_Adipocyte
DPA	11:61582708	chr11	61582708	2	C	T	0.4813	-11.12	9.995e-29	MIR611	ENSG00000207601.1	noncoding_RNA	61559937	61561535	61581230	61583902	FADS1|FADS2|MIR1908	TRUE	6.31	4frag	hMSC_Adipocyte
ALA	11:61582708	chr11	61582708	1	C	T	0.4813	7.826	5.051e-15	TMEM258	ENSG00000134825.9	protein_coding	61559937	61561535	61581230	61583902	FADS1|FADS2|MIR1908	TRUE	6.31	4frag	hMSC_Adipocyte
DPA	11:61582708	chr11	61582708	2	C	T	0.4813	-11.12	9.995e-29	TMEM258	ENSG00000134825.9	protein_coding	61559937	61561535	61581230	61583902	FADS1|FADS2|MIR1908	TRUE	6.31	4frag	hMSC_Adipocyte
AA	11:67120530	chr11	67120530	5	G	C	0.2041	-7.043	1.88e-12	RAD9A	ENSG00000172613.3	protein_coding	67160702	67162324	67119774	67122304	POLD4	TRUE	6.27	4frag	hMSC_Adipocyte
LA	11:67120530	chr11	67120530	2	G	C	0.2041	5.909	3.444e-09	RAD9A	ENSG00000172613.3	protein_coding	67160702	67162324	67119774	67122304	POLD4	TRUE	6.27	4frag	hMSC_Adipocyte
AA	11:67120530	chr11	67120530	5	G	C	0.2041	-7.043	1.88e-12	RNU6-1238P	ENSG00000253024.1	noncoding_RNA	67160702	67162324	67119774	67122304	POLD4	TRUE	6.27	4frag	hMSC_Adipocyte
LA	11:67120530	chr11	67120530	2	G	C	0.2041	5.909	3.444e-09	RNU6-1238P	ENSG00000253024.1	noncoding_RNA	67160702	67162324	67119774	67122304	POLD4	TRUE	6.27	4frag	hMSC_Adipocyte
DGLA	11:61560081	chr11	61560081	1	A	G	0.4889	14.704	6.032e-49	FADS1	ENSG00000149485.12	protein_coding	61581230	61583902	61559937	61561535	FEN1|TMEM258|FADS2|MIR611	TRUE	6.26	4frag	hMSC
DGLA	11:61560081	chr11	61560081	1	A	G	0.4889	14.704	6.032e-49	FADS2	ENSG00000134824.9	protein_coding	61581230	61583902	61559937	61561535	FEN1|TMEM258|FADS2|MIR611	TRUE	6.26	4frag	hMSC
DGLA	11:61560081	chr11	61560081	1	A	G	0.4889	14.704	6.032e-49	MIR1908	ENSG00000222326.1	noncoding_RNA	61581230	61583902	61559937	61561535	FEN1|TMEM258|FADS2|MIR611	TRUE	6.26	4frag	hMSC
DGLA	11:61524366	chr11	61524366	4	C	A	0.3635	-5.959	2.544e-09	FADS1	ENSG00000149485.12	protein_coding	61581230	61583902	61520317	61525535	MYRF|RP11-467L20.10	TRUE	6.25	4frag	Enteroid
DGLA	11:61524366	chr11	61524366	4	C	A	0.3635	-5.959	2.544e-09	FADS2	ENSG00000134824.9	protein_coding	61581230	61583902	61520317	61525535	MYRF|RP11-467L20.10	TRUE	6.25	4frag	Enteroid
DGLA	11:61524366	chr11	61524366	4	C	A	0.3635	-5.959	2.544e-09	MIR1908	ENSG00000222326.1	noncoding_RNA	61581230	61583902	61520317	61525535	MYRF|RP11-467L20.10	TRUE	6.25	4frag	Enteroid
ALA	11:61582708	chr11	61582708	1	C	T	0.4813	7.826	5.051e-15	BEST1	ENSG00000167995.11	protein_coding	61717011	61717560	61581754	61583007	FADS2|FADS1|MIR1908	TRUE	6.15	1frag	Enteroid
DPA	11:61582708	chr11	61582708	2	C	T	0.4813	-11.12	9.995e-29	BEST1	ENSG00000167995.11	protein_coding	61717011	61717560	61581754	61583007	FADS2|FADS1|MIR1908	TRUE	6.15	1frag	Enteroid
ALA	11:61582708	chr11	61582708	1	C	T	0.4813	7.826	5.051e-15	FADS2	ENSG00000134824.9	protein_coding	61559937	61561535	61581230	61583902	FADS1|FADS2|MIR1908	TRUE	6.11	4frag	hMSC
DPA	11:61582708	chr11	61582708	2	C	T	0.4813	-11.12	9.995e-29	FADS2	ENSG00000134824.9	protein_coding	61559937	61561535	61581230	61583902	FADS1|FADS2|MIR1908	TRUE	6.11	4frag	hMSC
ALA	11:61582708	chr11	61582708	1	C	T	0.4813	7.826	5.051e-15	FEN1	ENSG00000168496.3	protein_coding	61559937	61561535	61581230	61583902	FADS1|FADS2|MIR1908	TRUE	6.11	4frag	hMSC
DPA	11:61582708	chr11	61582708	2	C	T	0.4813	-11.12	9.995e-29	FEN1	ENSG00000168496.3	protein_coding	61559937	61561535	61581230	61583902	FADS1|FADS2|MIR1908	TRUE	6.11	4frag	hMSC
ALA	11:61582708	chr11	61582708	1	C	T	0.4813	7.826	5.051e-15	MIR611	ENSG00000207601.1	noncoding_RNA	61559937	61561535	61581230	61583902	FADS1|FADS2|MIR1908	TRUE	6.11	4frag	hMSC
DPA	11:61582708	chr11	61582708	2	C	T	0.4813	-11.12	9.995e-29	MIR611	ENSG00000207601.1	noncoding_RNA	61559937	61561535	61581230	61583902	FADS1|FADS2|MIR1908	TRUE	6.11	4frag	hMSC
ALA	11:61582708	chr11	61582708	1	C	T	0.4813	7.826	5.051e-15	TMEM258	ENSG00000134825.9	protein_coding	61559937	61561535	61581230	61583902	FADS1|FADS2|MIR1908	TRUE	6.11	4frag	hMSC
DPA	11:61582708	chr11	61582708	2	C	T	0.4813	-11.12	9.995e-29	TMEM258	ENSG00000134825.9	protein_coding	61559937	61561535	61581230	61583902	FADS1|FADS2|MIR1908	TRUE	6.11	4frag	hMSC
AA	11:67120530	chr11	67120530	5	G	C	0.2041	-7.043	1.88e-12	KDM2A	ENSG00000173120.10	protein_coding	67006465	67008872	67119774	67122304	POLD4	TRUE	6.1	4frag	HEPG2
LA	11:67120530	chr11	67120530	2	G	C	0.2041	5.909	3.444e-09	KDM2A	ENSG00000173120.10	protein_coding	67006465	67008872	67119774	67122304	POLD4	TRUE	6.1	4frag	HEPG2
ALA	11:61582708	chr11	61582708	1	C	T	0.4813	7.826	5.051e-15	FADS2	ENSG00000134824.9	protein_coding	61559937	61560806	61581754	61583007	FADS2|FADS1|MIR1908	TRUE	5.88	1frag	hMSC
DPA	11:61582708	chr11	61582708	2	C	T	0.4813	-11.12	9.995e-29	FADS2	ENSG00000134824.9	protein_coding	61559937	61560806	61581754	61583007	FADS2|FADS1|MIR1908	TRUE	5.88	1frag	hMSC
ALA	11:61582708	chr11	61582708	1	C	T	0.4813	7.826	5.051e-15	FEN1	ENSG00000168496.3	protein_coding	61559937	61560806	61581754	61583007	FADS2|FADS1|MIR1908	TRUE	5.88	1frag	hMSC
DPA	11:61582708	chr11	61582708	2	C	T	0.4813	-11.12	9.995e-29	FEN1	ENSG00000168496.3	protein_coding	61559937	61560806	61581754	61583007	FADS2|FADS1|MIR1908	TRUE	5.88	1frag	hMSC
ALA	11:61582708	chr11	61582708	1	C	T	0.4813	7.826	5.051e-15	MIR611	ENSG00000207601.1	noncoding_RNA	61559937	61560806	61581754	61583007	FADS2|FADS1|MIR1908	TRUE	5.88	1frag	hMSC
DPA	11:61582708	chr11	61582708	2	C	T	0.4813	-11.12	9.995e-29	MIR611	ENSG00000207601.1	noncoding_RNA	61559937	61560806	61581754	61583007	FADS2|FADS1|MIR1908	TRUE	5.88	1frag	hMSC
ALA	11:61582708	chr11	61582708	1	C	T	0.4813	7.826	5.051e-15	TMEM258	ENSG00000134825.9	protein_coding	61559937	61560806	61581754	61583007	FADS2|FADS1|MIR1908	TRUE	5.88	1frag	hMSC
DPA	11:61582708	chr11	61582708	2	C	T	0.4813	-11.12	9.995e-29	TMEM258	ENSG00000134825.9	protein_coding	61559937	61560806	61581754	61583007	FADS2|FADS1|MIR1908	TRUE	5.88	1frag	hMSC
ALA	11:61582708	chr11	61582708	1	C	T	0.4813	7.826	5.051e-15	FADS2	ENSG00000134824.9	protein_coding	61559937	61561535	61581230	61583902	FADS1|FADS2|MIR1908	TRUE	5.73	4frag	iPSC_Hepatocytes
DPA	11:61582708	chr11	61582708	2	C	T	0.4813	-11.12	9.995e-29	FADS2	ENSG00000134824.9	protein_coding	61559937	61561535	61581230	61583902	FADS1|FADS2|MIR1908	TRUE	5.73	4frag	iPSC_Hepatocytes
ALA	11:61582708	chr11	61582708	1	C	T	0.4813	7.826	5.051e-15	FEN1	ENSG00000168496.3	protein_coding	61559937	61561535	61581230	61583902	FADS1|FADS2|MIR1908	TRUE	5.73	4frag	iPSC_Hepatocytes
DPA	11:61582708	chr11	61582708	2	C	T	0.4813	-11.12	9.995e-29	FEN1	ENSG00000168496.3	protein_coding	61559937	61561535	61581230	61583902	FADS1|FADS2|MIR1908	TRUE	5.73	4frag	iPSC_Hepatocytes
ALA	11:61582708	chr11	61582708	1	C	T	0.4813	7.826	5.051e-15	MIR611	ENSG00000207601.1	noncoding_RNA	61559937	61561535	61581230	61583902	FADS1|FADS2|MIR1908	TRUE	5.73	4frag	iPSC_Hepatocytes
DPA	11:61582708	chr11	61582708	2	C	T	0.4813	-11.12	9.995e-29	MIR611	ENSG00000207601.1	noncoding_RNA	61559937	61561535	61581230	61583902	FADS1|FADS2|MIR1908	TRUE	5.73	4frag	iPSC_Hepatocytes
ALA	11:61582708	chr11	61582708	1	C	T	0.4813	7.826	5.051e-15	TMEM258	ENSG00000134825.9	protein_coding	61559937	61561535	61581230	61583902	FADS1|FADS2|MIR1908	TRUE	5.73	4frag	iPSC_Hepatocytes
DPA	11:61582708	chr11	61582708	2	C	T	0.4813	-11.12	9.995e-29	TMEM258	ENSG00000134825.9	protein_coding	61559937	61561535	61581230	61583902	FADS1|FADS2|MIR1908	TRUE	5.73	4frag	iPSC_Hepatocytes
AA	11:67120530	chr11	67120530	5	G	C	0.2041	-7.043	1.88e-12	AIP	ENSG00000110711.5	protein_coding	67257266	67258406	67119774	67122304	POLD4	TRUE	5.68	4frag	Enteroid
LA	11:67120530	chr11	67120530	2	G	C	0.2041	5.909	3.444e-09	AIP	ENSG00000110711.5	protein_coding	67257266	67258406	67119774	67122304	POLD4	TRUE	5.68	4frag	Enteroid
DGLA	11:61560081	chr11	61560081	1	A	G	0.4889	14.704	6.032e-49	FADS1	ENSG00000149485.12	protein_coding	61581230	61583902	61559937	61561535	FEN1|TMEM258|FADS2|MIR611	TRUE	5.66	4frag	hMSC_Adipocyte
DGLA	11:61560081	chr11	61560081	1	A	G	0.4889	14.704	6.032e-49	FADS2	ENSG00000134824.9	protein_coding	61581230	61583902	61559937	61561535	FEN1|TMEM258|FADS2|MIR611	TRUE	5.66	4frag	hMSC_Adipocyte
DGLA	11:61560081	chr11	61560081	1	A	G	0.4889	14.704	6.032e-49	MIR1908	ENSG00000222326.1	noncoding_RNA	61581230	61583902	61559937	61561535	FEN1|TMEM258|FADS2|MIR611	TRUE	5.66	4frag	hMSC_Adipocyte
DGLA	11:61524366	chr11	61524366	4	C	A	0.3635	-5.959	2.544e-09	PPP1R32	ENSG00000162148.6	protein_coding	61247824	61249089	61520317	61525535	MYRF|RP11-467L20.10	TRUE	5.65	4frag	Enteroid
AA	11:67120530	chr11	67120530	5	G	C	0.2041	-7.043	1.88e-12	KDM2A	ENSG00000173120.10	protein_coding	67006465	67008872	67119774	67122304	POLD4	TRUE	5.11	4frag	hMSC_Adipocyte
LA	11:67120530	chr11	67120530	2	G	C	0.2041	5.909	3.444e-09	KDM2A	ENSG00000173120.10	protein_coding	67006465	67008872	67119774	67122304	POLD4	TRUE	5.11	4frag	hMSC_Adipocyte

## Sheet: Table S5 Replication in HIS
Table S5. Cross-ethnic Replication for lead variants from credible sets of putative causal variants in Hispanic Americans
		Discovery			Replication in MESA									Replication in CHARGE
		Hispanic Americans			European Americans			African American (Meta-Analysis)			Chinese American			Previous Eurpoean Americans GWAS in CHARGE
	MarkerName	EAF	Zscore	Pvalue	EAF	Zscore	Pvalue	EAF	Zscore	Pvalue	EAF	Zscore	Pvalue	Freq	Effect	StdErr	P-value
AA	rs102274	0.5065	-24.261	5.12e-130	0.33107	-26.2358	1.039e-151	0.0994	-14.454	2.356e-47	0.59309	-20.3189	8.751e-92	0.33107	NA	NA	NA
	rs142068305	0.196	-7.063	1.633e-12	0.00355	1.97147	0.04867	0.0067	0.64269	0.5204	0.00523	-0.46034	0.6453	0.00355	NA	NA	NA
	rs28364240	0.2041	-7.043	1.88e-12	0.003	2.08703	0.03689	0.00739	0.64129	0.5213	0.00487	-0.35027	0.7261	0.003	NA	NA	NA
	rs2668898	0.4025	-5.837	5.325e-09	0.25052	-2.88203	0.003951	0.5139	2.452	0.01422	0.86633	1.69414	0.09024	0.253	-0.261	0.0354	1.836e-13
	rs180792704	0.1995	-7.567	3.816e-14	0.00442	1.40099	0.1612	0.01905	-0.09875	0.9213	0.02946	1.54277	0.1229	0.00442	NA	NA	NA
	rs198434	0.7104	-8.976	2.805e-19	0.62171	-2.09748	0.03595	0.6494	2.452	0.01422	0.94122	1.69465	0.09014	0.62171	NA	NA	NA
	rs518804	0.4207	-7.738	1.012e-14	0.23555	1.48026	0.1388	0.228	-0.064	0.9489	0.761	-0.76932	0.4417	0.236	0.0633	0.0348	0.06854
	rs3177514	0.6996	-5.606	2.068e-08	0.67876	0.80875	0.4187	0.2924	-0.72	0.4717	0.53017	-0.71901	0.4721	0.67876	NA	NA	NA
ALA	rs174562	0.5036	7.846	4.307e-15	0.32743	9.88537	4.818e-23	0.0954	4.569	4.909e-06	0.59372	6.22299	4.878e-10	0.32743	NA	NA	NA
DGLA	rs174538	0.4889	14.704	6.032e-49	0.29975	16.8504	1.042e-63	0.0904	7.232	4.766e-13	0.58897	0.42931	0.6677	0.2932	0.3761	0.0142	1.47e-154
	rs174585	0.2749	9.826	8.724e-23	0.20657	14.355	9.911e-47	0.0614	5.96	2.518e-09	0.14115	-1.23784	0.2158	0.2239	0.3962	0.0168	2.71e-122
	rs198434	0.7104	6.272	3.57e-10	0.62171	3.01871	0.002539	0.6494	1.591	0.1115	0.94122	0.62725	0.5305	0.62171	NA	NA	NA
	rs198461	0.3635	-5.959	2.544e-09	0.49314	-5.78223	7.372e-09	0.4597	-0.271	0.7861	0.1345	-0.97048	0.3318	0.49314	NA	NA	NA
	rs57112407	0.255	-5.86	4.46e-09	0.32476	0.0006	0.9833	0.1199	-1.664	0.09606	0.3279	1.19365	0.2326	0.32476	NA	NA	NA
	rs4985155	0.5242	-7.72	1.161e-14	0.35984	-8.42055	3.747e-17	0.3305	-4.744	2.1e-06	0.44073	-2.15265	0.03135	0.352	-0.222	0.0128	1.562e-67
DPA	rs1535	0.5201	-11.318	1.073e-29	0.33052	-8.35818	6.369e-17	0.1665	-3.684	0.0002295	0.59502	-4.61385	3.953e-06	0.33	-0.074	0.0028	2.55e-152
	rs198434	0.7104	-6.267	3.676e-10	0.62039	-0.7286	0.4662	0.6494	-0.866	0.3862	0.94122	0.17112	0.8641	0.62039	NA	NA	NA
EPA	rs102274	0.5065	-11.565	6.184e-31	0.33107	-6.68881	2.25e-11	0.1021	-1.966	0.04926	0.59309	-2.36591	0.01799	0.33107	NA	NA	NA
GLA	rs174576	0.5461	-7.73	1.071e-14	0.33654	-8.04968	8.301e-16	0.2848	-2.69	0.007153	0.5959	-10.2959	7.351e-25	0.339	-0.0158	0.0009	6.117e-72
LA	rs174564	0.5206	15.118	1.235e-51	0.33374	13.0286	8.417e-39	0.1407	7.355	1.904e-13	0.59417	10.4931	9.297e-26	0.33374	NA	NA	NA
	rs10751002	0.6648	6.06	1.365e-09	0.5413	0.08069	0.9357	0.3687	0.126	0.8994	0.83838	0.17245	0.8631	0.5413	NA	NA	NA
	rs28364240	0.2041	5.909	3.444e-09	0.003	-1.19533	0.232	0.00739	-1.25198	0.2106	0.00487	3.03184	0.02431	0.003	NA	NA	NA
	rs2668898	0.4025	5.542	2.994e-08	0.25052	3.09249	0.001985	0.5139	-1.42	0.1557	0.86633	-0.66374	0.5069	0.256	0.2759	0.0496	2.736e-08
	rs518804	0.4207	6.031	1.626e-09	0.23555	-0.80659	0.4199	0.228	0.876	0.3813	0.761	0.38193	0.7025	0.236	-0.149	0.0494	0.0026
	rs11039018	0.67	-6.107	1.016e-09	0.8603	-0.56013	0.5754	0.6974	7.355	1.904e-13	0.39815	-1.00685	0.314	0.8603	NA	NA	NA

## Sheet: Table S6 Replication in AFA
Table S6. Cross-ethnic Replication for lead variants from credible sets of putative causal variants in African Americans
		Discovery			Replication									Replication
		African American			White			Hispanic (Meta-Analysis)			Chinese			Previou GWAS at CHARGE
	MarkerName	EAF	Zscore	Pvalue	EAF	Zscore	Pvalue	EAF	Zscore	Pvalue	EAF	Zscore	Pvalue	Freq	Effect	StdErr	P-value
AA	rs174585	0.0607	-9.328	1.08e-20	0.20657	-15.8793	8.813e-57	0.2749	-11.512	1.144e-30	0.14115	-6.42169	1.348e-10	0.2209	-1.2448	0.0344	3.96e-286
	rs174607	0.0788	-6.492	8.47e-11	0.26529	-13.3454	1.259e-40	0.172	-3.53	0.0004151	NA	NA	NA	0.26529	NA	NA	NA
	rs174564	0.1337	-14.855	6.43e-50	0.33374	-26.7135	3.282e-157	0.5206	-24.032	1.29e-127	0.59417	-20.594	3.104e-94	0.33374	NA	NA	NA
	rs174559	0.0783	-13.684	1.27e-42	0.25812	-23.8215	1.997e-125	0.4644	-3.53	0.0004151	0.57551	-19.6788	3.277e-86	0.25812	NA	NA	NA
	rs17161592	0.085	-6.312	2.75e-10	0.137	-0.71485	0.4747	0.2566	0.547	0.5842	0.1486	-1.12764	0.2595	0.1584	0.0703	0.0516	0.1736
DGLA	rs1136001	0.2203	-6.114	9.69e-10	0.31704	-8.27577	1.276e-16	0.4503	-7.298	2.928e-13	0.36781	-3.02967	0.002448	0.3108	-0.2206	0.0129	3.655e-65
	rs174560	0.2163	9.12	7.51e-20	0.29434	16.4434	9.344e-61	0.5165	14.727	4.336e-49	0.57999	0.2092	0.8343	0.29434	NA	NA	NA
LA	rs1535	0.1633	7.885	3.14e-15	0.29591	12.3941	2.815e-35	0.5201	14.81	1.262e-49	0.58006	10.683	1.222e-26	0.6739	-1.4628	0.0415	4.47e-272
DHA	rs114622288	0.05	-5.71	1.16e-08	NA	NA	NA	NA	NA	NA	NA	NA	NA	NA	NA	NA	NA
DPA	rs717894	0.2504	-5.486	4.11e-08	0.06457	1.37072	0.1705	0.1033	-0.388	0.6983	0.09791	-0.359	0.7196	0.06457	NA	NA	NA
	rs9295741	0.2237	5.548	2.89e-08	0.43306	6.21439	5.152e-10	0.5057	2.719	0.006541	0.70691	2.4146	0.01575	0.43306	NA	NA	NA

## Sheet: Table S7 Validation in HIS
Table S7. Association with lipid traits for lead variants from credible sets of putative causal variants in Hispanic Americans
		HDL			LDL			LogTG			TC
		beta	se	pvalue	beta	se	pvalue	beta	se	pvalue	beta	se	pvalue
AA	rs102274	-0.0432	0.0013	4.77e-232	-0.0423	0.0014	7.47e-214	0.0508	0.0013	0	-0.0404	0.0013	1.21e-218
	rs142068305	-0.0038	0.0076	0.6151	-0.0611	0.0333	0.06616	-0.0579	0.0331	0.08061	-0.0507	0.0324	0.1171
	rs28364240	0.0654	0.0533	0.2195	0.0197	0.0545	0.7179	-0.0408	0.0525	0.4376	0.0262	0.0513	0.6102
	rs2668898	-0.0032	0.0015	0.03025	-0.0074	0.0015	6.73e-07	0.002	0.0015	0.1717	-0.0082	0.0014	1.525e-08
	rs180792704	0.0132	0.0218	0.5458	-0.0073	0.022	0.7391	-0.0185	0.0219	0.3984	-0.0052	0.0216	0.8102
	rs198434	-0.0554	0.0326	0.08918	0.0028	0.0014	0.04537	0.0044	0.0014	0.001653	0.0021	0.0014	0.1209
	rs518804	-0.0069	0.0015	1.959e-06	0.0039	0.0015	0.008646	0.0046	0.0014	0.001518	0.002	0.0014	0.1588
	rs3177514	-0.0029	0.0013	0.02828	0	0.0014	0.9803	0.0013	0.0013	0.3369	-0.0007	0.0013	0.6127
ALA	rs174562	-0.0435	0.0013	2.68e-234	-0.0426	0.0014	3.09e-215	0.0514	0.0013	0	-0.0407	0.0013	2.75e-220
DGLA	rs174538	-0.0406	0.0014	6.37e-190	-0.0401	0.0014	5.82e-183	0.0482	0.0014	1.29e-270	-0.0382	0.0013	9.77e-178
	rs174585	-0.0287	0.0016	2.619e-68	-0.0285	0.0017	1.774e-66	0.0347	0.0016	6.45e-100	-0.0267	0.0016	1.113e-62
	rs198434	-0.0554	0.0326	0.08918	0.0028	0.0014	0.04537	0.0044	0.0014	0.001653	0.0021	0.0014	0.1209
	rs198461	0.0096	0.0013	4.81e-13	0.0099	0.0013	1.919e-13	-0.0117	0.0013	1.187e-18	0.0097	0.0013	5.634e-14
	rs57112407	-0.0027	0.0014	0.05679	0.0025	0.0015	0.08729	0.0024	0.0014	0.09965	0.0016	0.0014	0.2461
	rs4985155	-0.0098	0.0013	4.529e-14	-0.0047	0.0013	0.0003983	0.0199	0.0013	1.961e-52	-0.0024	0.0013	0.06385
DPA	rs1535	-0.0434	0.0013	2.24e-231	-0.0416	0.0013	3.68e-210	0.0501	0.0013	0	-0.0401	0.0013	1.02e-208
	rs198434	-0.0554	0.0326	0.08918	0.0028	0.0014	0.04537	0.0044	0.0014	0.001653	0.0021	0.0014	0.1209
EPA	rs102274	-0.0432	0.0013	4.77e-232	-0.0423	0.0014	7.47e-214	0.0508	0.0013	0	-0.0404	0.0013	1.21e-218
GLA	rs174576	-0.0418	0.0013	4.31e-221	-0.0402	0.0013	6.94e-202	0.0487	0.0013	1.19e-303	-0.0387	0.0013	1.04e-199
LA	rs174564	-0.0433	0.0013	4.63e-235	-0.0423	0.0014	1.06e-215	0.0513	0.0013	0	-0.0406	0.0013	9.12e-222
	rs10751002	0	0.0015	0.999	0.0104	0.0015	3.307e-12	-0.0003	0.0015	0.8489	0.0085	0.0015	5.744e-09
	rs28364240	0.0654	0.0533	0.2195	0.0197	0.0545	0.7179	-0.0408	0.0525	0.4376	0.0262	0.0513	0.6102
	rs2668898	-0.0032	0.0015	0.03025	-0.0074	0.0015	6.73e-07	0.002	0.0015	0.1717	-0.0082	0.0014	1.525e-08
	rs518804	-0.0069	0.0015	1.959e-06	0.0039	0.0015	0.008646	0.0046	0.0014	0.001518	0.002	0.0014	0.1588
	rs11039018	0.0304	0.0017	2.846e-74	-0.0017	0.0017	0.3227	-0.0228	0.0017	4.576e-43	0.0018	0.0016	0.2568

## Sheet: Table S8 validation in AFA
Table S8. Association with lipid traits for lead variants from credible sets of putative causal variants in African Americans
		HDL			LDL			LogTG			TC
		beta	se	pvalue	beta	se	pvalue	beta	se	pvalue	beta	se	pvalue
AA	rs174585	-0.0287	0.0016	2.619e-68	-0.0285	0.0017	1.774e-66	0.0347	0.0016	6.45e-100	-0.0267	0.0016	1.113e-62
	rs174607	-0.0235	0.0016	2.522e-48	-0.0227	0.0016	1.884e-44	0.0297	0.0016	2.365e-76	-0.0208	0.0016	1.882e-40
	rs174564	-0.0433	0.0013	4.63e-235	-0.0423	0.0014	1.06e-215	0.0513	0.0013	0	-0.0406	0.0013	9.12e-222
	rs174559	-0.0393	0.0014	3.11e-173	-0.0394	0.0014	2.99e-166	0.0473	0.0014	2.57e-245	-0.0373	0.0014	2.28e-167
	rs17161592	0.0013	0.0018	0.4913	0.0019	0.0019	0.3176	0.0004	0.0018	0.8441	0.0024	0.0018	0.1867
DGLA	rs1136001	-0.0104	0.0013	1.208e-14	-0.0038	0.0014	0.005276	0.021	0.0013	1.078e-55	-0.0015	0.0013	0.2467
	rs174560	-0.0414	0.0013	1.5e-209	-0.0399	0.0014	2.52e-187	0.0485	0.0013	2.41e-282	-0.0385	0.0013	6.6e-195
LA	rs1535	-0.0434	0.0013	2.24e-231	-0.0416	0.0013	3.68e-210	0.0501	0.0013	0	-0.0401	0.0013	1.02e-208
DHA	rs114622288	0.0051	0.011	0.6388	0.0092	0.0111	0.4069	0.0093	0.011	0.4006	0.0121	0.0108	0.2609
DPA	rs717894	-0.0005	0.0024	0.8448	0.0022	0.0024	0.3647	0.0013	0.0024	0.5835	0.0023	0.0023	0.3252
	rs9295741	-0.0008	0.0013	0.5387	-0.0046	0.0013	0.000374	0.0027	0.0013	0.03429	-0.0023	0.0012	0.05373

## Sheet: Table S9 Colo in HIS MESA eQTL
Table S9. Colocalization analysis using MESA multi-ancestry eQTL in Hispanic Americans
PUFAs	Chromosome	PP.H0.abf	PP.H1.abf	PP.H2.abf	PP.H3.abf	PP.H4.abf	Gene
AA	11	4.96426e-20	1.1685e-10	4.48667e-12	0.00957038	0.99043	MED19
	11	5.5603e-127	3.90972e-05	9.36012e-124	0.0648805	0.93508	TMEM258
	11	2.32559e-12	0.207508	9.53378e-13	0.08436	0.708132	PACS1
	11	1.62084e-10	0.379062	2.70772e-11	0.0627668	0.558171	RAD9A
ALA	11	4.86264e-13	5.56613e-05	8.18569e-10	0.0927923	0.907152	TMEM258
	11	2.06314e-09	3.16193e-10	0.186465	0.0277916	0.785743	MED19
DGLA	11	1.62828e-48	3.48135e-05	2.74102e-45	0.0576622	0.942303	TMEM258
	16	1.41703e-10	0.00114716	6.16475e-09	0.0489572	0.949896	PDXDC1
DPA	11	7.21121e-27	5.34648e-05	1.21392e-23	0.0890911	0.910855	TMEM258
	11	0.0114612	0.325834	0.00381845	0.108005	0.550881	C11orf24
	11	0.0135472	0.386516	0.00226316	0.0640366	0.533637	RAD9A
EPA	11	7.15923e-29	2.81089e-05	1.20517e-25	0.0463645	0.953607	TMEM258
GLA	11	2.09534e-12	4.01546e-05	3.52727e-09	0.0666623	0.933298	TMEM258
LA	11	5.74894e-13	1.40764e-09	5.19586e-05	0.126348	0.8736	MED19
	11	0.0407732	0.247539	0.0103056	0.0619268	0.639456	CTTN
	11	1.53151e-07	0.30798	5.10245e-08	0.102018	0.590001	C11orf24
	11	1.84467e-07	0.371409	3.08165e-08	0.0614794	0.567111	RAD9A

## Sheet: Table S10 Colo at HIS GTEx eQTL
Table S10. Colocalization analysis using GTEx multi-ancestry eQTL in Hispanic Americans
PUFAs	chromosome	PP.H0.abf	PP.H1.abf	PP.H2.abf	PP.H3.abf	PP.H4.abf	Gene
AA	11	1.81251e-11	0.181049	5.29801e-12	0.0521543	0.766796	RPS4XP13
	11	2.92155e-14	0.330089	5.19918e-15	0.0581308	0.61178	AP001462.6
ALA	11	1.3586e-14	1.02181e-14	0.0883505	0.065603	0.846046	MED19
	11	3.44639e-10	0.176239	2.52101e-10	0.128222	0.695538	PGA5
DGLA	16	1.47195e-06	1.83566e-07	0.391064	0.0482086	0.560726	RP11-426C22.5
DPA	11	0.064884	0.153171	0.0474622	0.11142	0.623062	PGA5
EPA	11	1.14737e-12	6.75912e-13	0.0822992	0.0476119	0.870089	TPCN2
GLA	11	1.21805e-08	3.26028e-09	0.0687353	0.0174842	0.91378	MEN1
LA	11	1.01529e-18	1.22888e-14	6.6025e-06	0.078994	0.920999	MED19
	11	1.92196e-14	2.21052e-12	0.00137859	0.157716	0.840906	TPCN2
	11	9.74937e-48	0.000696244	2.3115e-45	0.164239	0.835065	FADS1
	11	1.98772e-05	0.240594	5.81016e-06	0.0696363	0.689744	RPS4XP13
	11	3.91612e-07	0.32392	6.96912e-08	0.0570257	0.619054	AP001462.6

[truncated: 3 more sheets: Table S11 PrediXcan in HIS MESA, Table S12 PrediXcan in HIS GTEx, Table S13 Gene Co-expression]
